# Supplementary material for: Operando deconvolution of photovoltaic and electrocatalytic performance in ALD TiO 2 protected water splitting photocathodes
Source: Royal Society of Chemistry journal article supplement (doi:10.1039/c8sc01453a), 2018-01-01
Supplement: c8sc01453a1.pdf [file c8sc01453a1.pdf]

## Electronic Supplementary Information

### *Operando* Deconvolution of Photovoltaic and Electrocatalytic Performance in ALD TiO<sub>2</sub> Protected Water Splitting Photocathodes

*Wei Cui,<sup>a</sup> Wenzhe Niu,<sup>ab</sup> René Wick-Joliat,<sup>a</sup> Thomas Moehl<sup>a</sup> and S. David Tilley<sup>\*a</sup>*

<sup>a</sup> Department of Chemistry, University of Zurich, Winterthurerstrasse 190, CH-8057 Zurich, Switzerland.

<sup>b</sup> State Key Laboratory of Silicon Materials, School of Materials Science and Engineering, Zhejiang University, Hangzhou, Zhejiang, China.

## Experimental Methods

**Si wafer cleaning.** (111)-oriented Si wafers (thickness  $\sim 0.5$  mm) used for DWE fabrication were purchased from PrimeWafers. The p-Si substrate was lightly boron-doped ( $\sim 2 \times 10^{16} \text{ cm}^{-3}$ ) and a 2  $\mu\text{m}$ -thick n-type surface layer (polished) was doped with phosphorus ( $\sim 2 \times 10^{19} \text{ cm}^{-3}$ ). These wafers were cut into  $2.5 \times 1 \text{ cm}^2$  pieces and sonicated sequentially in acetone, ethanol and MilliQ water (18 M $\Omega$ ) for 10 minutes each. Next, a two-step deep cleaning was accomplished by using a 5:1:1 mixture of  $\text{H}_2\text{O}:\text{NH}_4\text{OH}:\text{H}_2\text{O}_2$ , followed by a 5:1:1 mixture of  $\text{H}_2\text{O}:\text{HCl}:\text{H}_2\text{O}_2$ , both at 50 °C for 10 minutes, in order to completely remove organic and inorganic contaminants. The native oxide layer was etched away by dipping the wafer pieces in 2% HF for 30 s. The samples were then rinsed with deionized water and dried under a stream of nitrogen, and then placed immediately into the ALD chamber for deposition of  $\text{TiO}_2$  onto the  $\text{n}^+\text{-Si}$  surface.

**$\text{Cu}_2\text{O}$  plate preparation.** A  $\text{Cu}_2\text{O}$  plate was prepared via oxidation of a high purity Cu plate (99.9999%), using a method adapted from the literature.<sup>1</sup> The Cu plate (0.1 mm thick) was first cut into small pieces ( $\sim 2 \times 2 \text{ cm}^2$ ) and heated from room temperature to 1050 °C (ramp: 17 °C per min) and kept at this temperature for 1 h under Ar flow (1 L  $\text{min}^{-1}$ ). Next, air was introduced into the furnace and held for 3 h. The gas environment was then switched back to Ar for another 3 h of annealing at the same temperature. After cooling down to room-temperature under Ar, the as-prepared  $\text{Cu}_2\text{O}$  plate was dark red when held up to the light.

**Atomic layer deposition of TiO<sub>2</sub> and Ga<sub>2</sub>O<sub>3</sub>.** TiO<sub>2</sub> on Si wafer and Ga<sub>2</sub>O<sub>3</sub>-TiO<sub>2</sub> on Cu<sub>2</sub>O plate were deposited by atomic layer deposition (ALD) using a Picosun R200 tool. Before the deposition, the sample was rinsed with deionized water and dried under a stream of N<sub>2</sub>. The samples were then placed inside the ALD chamber, which was already heated to 120 °C. Tetrakis(dimethylamino)titanium (Sigma-Aldrich) and H<sub>2</sub>O were used as the precursor for Ti and O, respectively. The Ti precursor was heated to 85 °C and a 1.6 s pulse was used (with software boost function), followed by a 6.0 s N<sub>2</sub> purge. H<sub>2</sub>O was held at room temperature and a 0.1 s pulse was used, followed by a 6.0 s N<sub>2</sub> purge. To reach 100 nm of thickness for TiO<sub>2</sub>, 1860 cycles were used. Measurement of the thickness of ALD-TiO<sub>2</sub> deposited on a piece of Si witness wafer was carried out by ellipsometry (alpha-SE, J.A. Woolam Co.), and fitted with a model for transparent films. The cross sectional SEM image (Supplementary Fig. S1) shows that the ALD-TiO<sub>2</sub> protective layer is conformably coated on the Si wafer.

For the Ga<sub>2</sub>O<sub>3</sub> layer, bis(μ-dimethylamino)tetrakis-(dimethylamino)digallium (STREM, 98%) was used as Ga precursor. The ALD chamber temperature was kept at 160 °C during deposition. The Ga precursor was held at 150 °C and a 2.5 s pulse was used (with software boost function), followed by a 7.0 s N<sub>2</sub> purge. The H<sub>2</sub>O was held at room temperature, and a 0.1 s pulse was used, followed by a 4.0 s N<sub>2</sub> purge time. To deposit a 20 nm-thick Ga<sub>2</sub>O<sub>3</sub> thin film, 250 cycles were used. In order to avoid ALD growth on the back side of the sample (potentially leading to shunting problems), teflon tape was used to cover

the back side of the Si wafers and Cu<sub>2</sub>O plates during the ALD process.

Supplementary Fig. S13 present the Cu<sub>2</sub>O/Ga<sub>2</sub>O<sub>3</sub>/TiO<sub>2</sub> multilayered structure.

**Fabrication of Si-based DWE.** After ALD TiO<sub>2</sub> deposition, the working electrode 1 (WE1) contact was made to the back side of the p-type silicon by scratching the wafer, applying Ga–In eutectic (Aldrich) and attaching copper foil (Aldrich). A layer of epoxy resin (Loctite Epoxide-resin EA 9461) was then used to cover and glue the electrode to a glass microscope slide, with a certain portion of the TiO<sub>2</sub> surface left uncovered for use as the electrochemical active area. For making the front contact, a 20 nm-thick Au layer was sputtered (Safematic CCU-010) onto the epoxy as well as a small part of the exposed TiO<sub>2</sub>. A copper wire was connected to the Au layer with Ag paint (Ted Pella, Inc.) on top of the epoxy, as a connection for the second working electrode (WE2). Finally, the front contact was protected from the electrolyte by masking it with a second epoxy layer. Supplementary Fig. S2 shows an optical photograph and the structure scheme of an as-fabricated pn<sup>+</sup>Si/TiO<sub>2</sub> DWE.

**Fabrication of Cu<sub>2</sub>O-based DWE.** After the deposition of the Ga<sub>2</sub>O<sub>3</sub>-TiO<sub>2</sub> overlayer, a 100 nm-thick Au layer was then sputtered onto the back side of the Cu<sub>2</sub>O plate (the front side was protected with teflon tape), followed by connecting an Ag wire with Ag paint as WE1. Epoxy resin was then used to cover the whole back side of the electrode to provide protection and enhance the stiffness of the Cu<sub>2</sub>O plate. WE2 was connected to the ALD-TiO<sub>2</sub> surface using the same method as for the Si-based DWE, described above.

**Platinum catalyst deposition.** For some samples, Pt catalyst was deposited onto the as-prepared DWE via galvanostatic electrodeposition from a 1 mM  $\text{H}_2\text{PtCl}_6$  aqueous solution, denoted as Pt(ed). A constant current of  $-0.85 \mu\text{A cm}^{-2}$  was applied to the back contact (WE1) for 15 min. For other samples, nominally 2 nm-thick Pt catalyst was deposited by sputter coating, denoted as Pt(sp).

**Characterization.** The morphologies of electrodeposited Pt and sputtered 2 nm-thick Pt film, and the cross-sectional scanning electron microscopy (SEM) images of  $\text{pn}^+\text{Si/TiO}_2$  and  $\text{Cu}_2\text{O/Ga}_2\text{O}_3$  photoelectrodes were obtained with a Zeiss Supra 50 VP scanning electron microscope. The polycrystalline structure of the  $\text{Cu}_2\text{O}$  plate is revealed by the X-ray diffraction (XRD) pattern (Supplementary Fig. S14), using a Rigaku Smartlab diffractometer with Cu  $K\alpha$  radiation. UV-VIS spectra of the Pt(ed) and Pt(sp) on FTO slides were recorded with a Shimadzu UV-3600Plus UV/Vis/NIR spectrometer equipped with an integrating sphere.

**Photoelectrochemical Measurements.** Photoelectrochemical measurements were performed in a four-electrode configuration using a BioLogic SP-300 bipotentiostat. The reference electrode was Ag/AgCl (0.197 V vs. NHE) and a Pt wire served as the counter electrode. All electrode potentials were converted into RHE scale: at room temperature,  $V_{\text{RHE}} = V_{\text{NHE}} + 0.059 \times \text{pH} = V_{\text{Ag/AgCl}} + 0.059 \times \text{pH} + 0.197$ . Before the measurements, the electrolyte was sparged with  $\text{N}_2$  for at least 10 min to remove dissolved oxygen. Simulated one sun illumination ( $100 \text{ mW cm}^{-2}$ ) was provided by a 150 W Xe-lamp with AM 1.5 G filter from LOT Oriel, and the intensity was

calibrated with a standardized silicon diode from PV Measurements (USA). 0.5 M  $\text{H}_2\text{SO}_4$  and 0.1 M pH 5 phosphate solution (containing 0.5 M  $\text{Na}_2\text{SO}_4$ ) were used for Si-based and  $\text{Cu}_2\text{O}$ -based DWE experiments, respectively. Linear sweep voltammograms (LSVs) were collected by sweeping the back contact potential (V1). V1 stepwise measurements were performed by potential step chronoamperometry (CA). Each V1 potential step had a duration of 30 s. The stability tests of the samples were performed for 2 h with V1 held at 0  $V_{\text{RHE}}$  under one sun illumination. During all measurements, the second working electrode was kept at open circuit to record the surface potential (V2) against the reference electrode.

**Faradaic efficiencies.** The Faradaic efficiencies of the photocathodes were measured in a gas-tight three-compartment cell in a three-electrode configuration, with an Ag/AgCl reference electrode and a Pt wire counter electrode. The photocathodes were covered with epoxy to fix the active area to  $\sim 0.08 \text{ cm}^2$ . The measurement was performed in the same electrolyte as in the PEC measurements (described above). The electrolyte was stirred and constantly sparged with Ar gas at a rate of 20 ml/min. The gas outlet from the cell was connected to a 450-GC Gas Chromatograph Bruker Daltonics GmbH for gas analysis. One LSV scan was first performed for choosing a suitable V1 potential for the Faradaic efficiency tests. During the measurement, the exposed area of the photocathode was illuminated with a white-light LED. The intensity of the light was calibrated to reach a similar photocurrent density as obtained under simulated one sun illumination, as described above

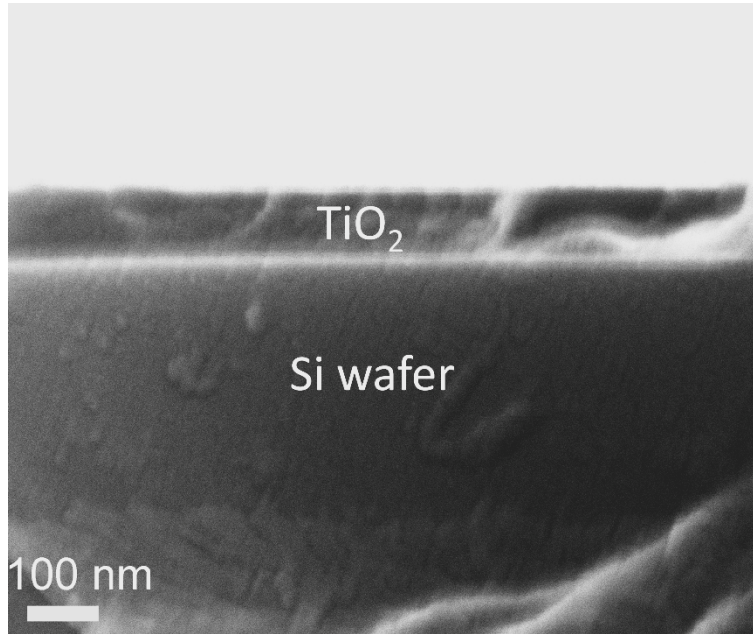

**Supplementary Fig. S1** Cross-sectional SEM image of the  $\text{pn}^+$ -Si wafer with 100 nm-thick ALD- $\text{TiO}_2$  protective layer.

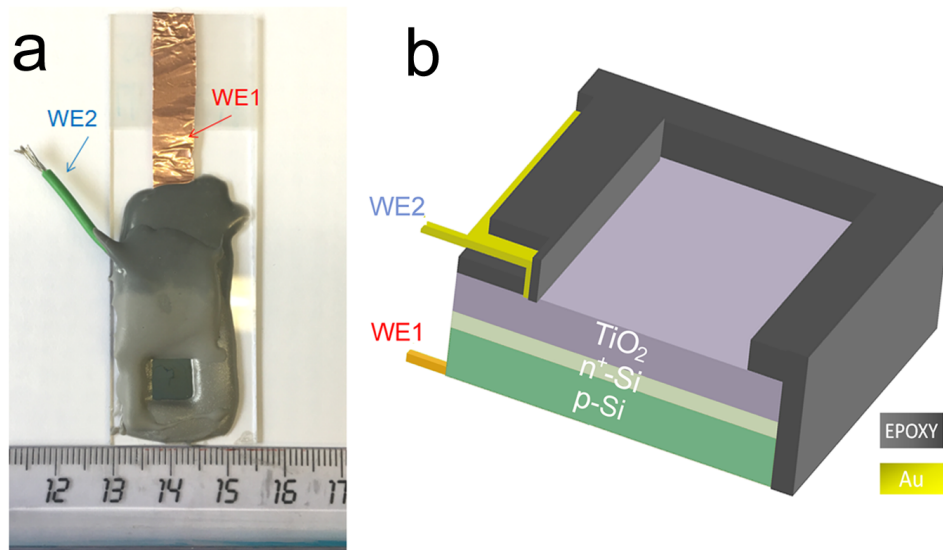

**Supplementary Fig. S2** (a) Photograph and (b) structure scheme of a  $\text{pn}^+\text{Si}/\text{TiO}_2$  DWE device.

The 100 nm-thick ALD-TiO<sub>2</sub> overlayer gives a dark green color on the Si wafer due to optical effects. WE1 is a piece of Cu foil attached to the back side of the p-Si via Ga–In eutectic. WE2 is a conductive cable directly connected to the TiO<sub>2</sub> layer via a 20 nm-thick Au layer and Ag paint. The electrode is protected by epoxy. The ruler is in centimeters.



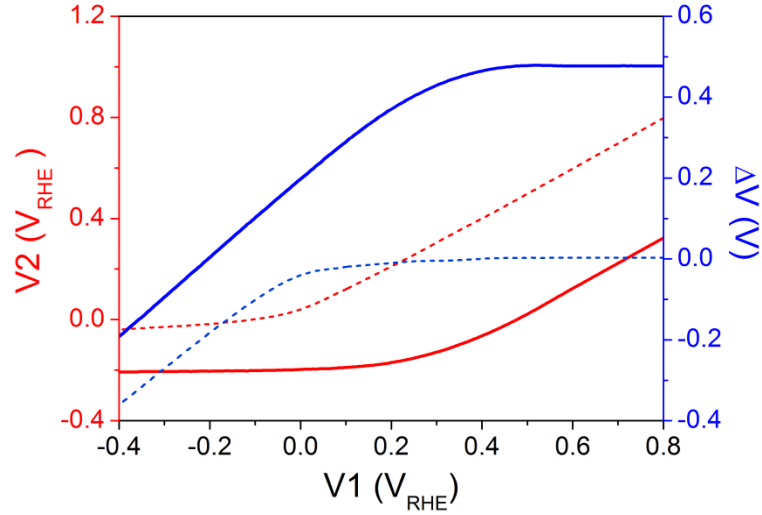

**Supplementary Fig. S3**  $V_2$  and  $\Delta V$  as a function as linearly swept  $V_1$  in dark (dashed) and light (solid) conditions.

When  $V_1$  is more positive than  $0 V_{RHE}$ ,  $V_2$  is similar to  $V_1$ , thus  $\Delta V$  is 0, indicating that no voltage difference is generated under dark conditions in this potential region. When  $V_1$  is scanned to more negative potentials than  $0 V_{RHE}$ ,  $V_2$  stays mainly unchanged with a value slightly more negative than  $0 V_{RHE}$ , contributing to the tiny dark current. This region of very negative  $V_1$  corresponds to a reverse bias across the p–n Si homojunction, as is evident from the  $\Delta V$ - $V_1$  curve.

Under illumination,  $\Delta V$  maintains a constant value of 475 mV until  $V_1$  reaches  $\sim 0.47 V_{RHE}$ . In this positive potential region,  $\Delta V$  equals the output  $V_{oc}$  as there is no current flow across the interface. The potential where  $\Delta V$  begins to shrink indicates the real onset potential of hydrogen production, which appears in this case at  $\sim 0.47 V_{RHE}$ . As the photocurrent increases while sweeping the potential negatively,  $\Delta V$  decreases until a saturation photocurrent density is obtained, and then continues to shrink as the photocurrent remains saturated.

| <b>J-ΔV</b>                                                                |                   | <b>V<sub>oc</sub></b><br><b>(mV)</b> | <b>J<sub>sc</sub></b><br><b>(mA cm<sup>-2</sup>)</b> | <b>FF</b><br><b>(%)</b> | <b>η</b><br><b>(%)</b> |
|----------------------------------------------------------------------------|-------------------|--------------------------------------|------------------------------------------------------|-------------------------|------------------------|
| pn <sup>+</sup> Si/TiO <sub>2</sub> /Pt(ed)                                | Initial scan      | 480                                  | 24.9                                                 | 58.4                    | 6.8                    |
|                                                                            | After 2h          | 470                                  | 24.1                                                 | 57.7                    | 6.5                    |
|                                                                            | After replatinize | 479                                  | 24.4                                                 | 57.6                    | 6.5                    |
| pn <sup>+</sup> Si/Ti/Pt(ed)                                               | Initial scan      | 448                                  | 23.5                                                 | 57.7                    | 6.1                    |
|                                                                            | After 2h          | 448                                  | 22.7                                                 | 59.7                    | 6.1                    |
| pn <sup>+</sup> Si/TiO <sub>2</sub> /Pt(sp)                                | One sun           | 447                                  | 18.2                                                 | 60.8                    | 5.0                    |
| pn <sup>+</sup> Si/TiO <sub>2</sub> /Pt(sp)                                | ~ 1.4 sun         | 473                                  | 24.8                                                 | 60.6                    | 5.2                    |
| Cu <sub>2</sub> O/Ga <sub>2</sub> O <sub>3</sub> /TiO <sub>2</sub> /Pt(sp) | Initial scan      | 836                                  | 4.0                                                  | 36.1                    | 1.5                    |
|                                                                            | After 2h          | 743                                  | 4.1                                                  | 44.5                    | 1.3                    |

**Supplementary Table S1** J-V parameters extracted from the J-ΔV behavior of the water splitting photocathodes. We expect the pn<sup>+</sup>-Si junction samples from the same wafer to generate the same V<sub>oc</sub>. The small V<sub>oc</sub> variation among pn<sup>+</sup>Si/TiO<sub>2</sub>/Pt(ed), pn<sup>+</sup>Si/Ti/Pt(ed), pn<sup>+</sup>Si/TiO<sub>2</sub>/Pt(sp) is likely due to the different light intensity as a result of light absorbtion by the catalyst and overlayers, or perhaps passivation and recombination at the Si/overlayer interface (through pinholes). The power conversion efficiency (η) is given for completeness, and is defined as:

$$\eta = \frac{FF \times J_{sc} \times V_{oc}}{P_{in}}$$

where P<sub>in</sub> of one sun illumination is the incident illumination power density (100 mW cm<sup>-2</sup>). For the pn<sup>+</sup>Si/TiO<sub>2</sub>/Pt(sp) sample, an increased light intensity (P<sub>in</sub> = ~137 mW cm<sup>-2</sup>) was also used.

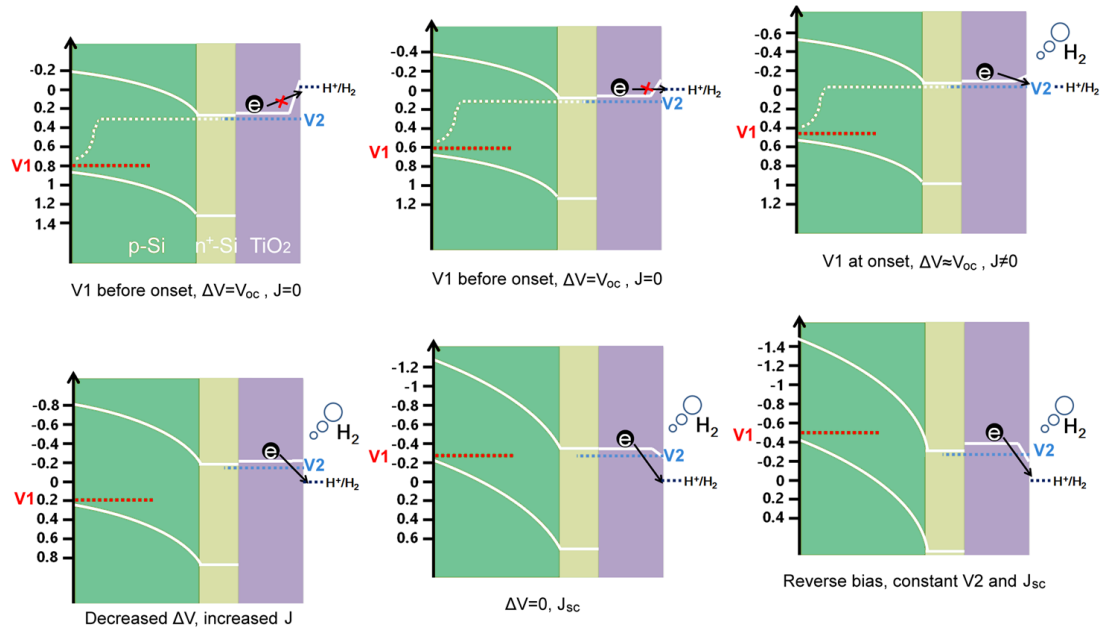

**Supplementary Fig. S4** Schematic band energy diagrams of a  $\text{pn}^+\text{-Si/TiO}_2$  photocathode during a LSV scan by controlling  $V_1$  (under illumination). The potentials of the y-axis are  $V_{\text{RHE}}$ , and  $E(\text{H}^+/\text{H}_2)$  is at 0  $V_{\text{RHE}}$ . The Pt catalyst at the  $\text{TiO}_2$  surface is not depicted in the schemes. Due to the high carrier doping density in both  $\text{n}^+\text{-Si}$  and  $\text{TiO}_2$ , the electron (quasi)-Fermi levels are located very close to the conduction band edge, and the space charge region widths are very short, ensuring that Ohmic contacts are formed at both the  $\text{n}^+\text{-Si/TiO}_2$  and  $\text{TiO}_2/\text{Pt}$  interfaces.

A  $\text{pn}/\text{cat}$  electrode can be seen as a PV cell with one of the current collectors replaced by the electrolyte solution, where under certain conditions of  $V_1$ , current can flow due to a chemical redox reaction at the surface. Schematically illustrated above, at very positive  $V_1$ , such as 0.8 or 0.6  $V_{\text{RHE}}$ , the electron quasi-Fermi level ( $V_2$ ) is still much more positive than  $E(\text{H}^+/\text{H}_2)$ . Photoexcited electrons cannot be transferred into solution since the potential of the photoexcited electrons is still not high enough to drive proton reduction. In this region of  $V_1$  (before the onset of hydrogen generation),  $\Delta V$  values remain constant and equal to  $V_{oc}$ . The flat band potential of  $\text{TiO}_2$  itself is located near  $E(\text{H}^+/\text{H}_2)$ . As soon as  $V_2$  is slightly more negative than 0  $V_{\text{RHE}}$ ,

hydrogen evolution is thermodynamically allowed, and electrons flow into the electrolyte by reducing protons into hydrogen gas. The  $V_1$  potential at this point is defined as the onset potential. As  $V_1$  becomes more negative, the  $\Delta V$  value shrinks as the photocurrent corresponding to hydrogen generation increases. When  $V_1$  catches up to  $V_2$ ,  $\Delta V$  is 0 and the buried p–n junction is at the short-circuit condition. Finally, as soon as the photocurrent becomes saturated due to the photon flux and recombination,  $V_2$  reaches a steady value independent of  $V_1$ . The reverse bias across the p–n junction becomes stronger as  $V_1$  level continues to move to more negative potential.

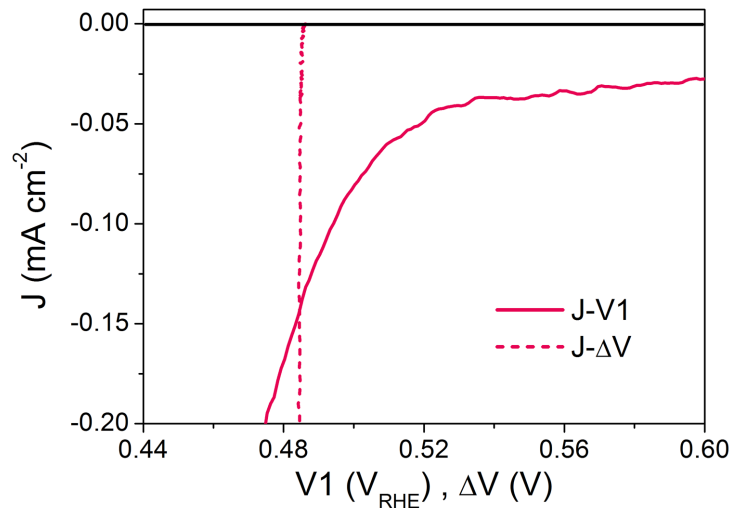

**Supplementary Fig. S5** Zoom-in view of J-V1 (solid) and J- $\Delta V$  (dashed) curves of a  $\text{pn}^+\text{Si/TiO}_2/\text{Pt(ed)}$  photocathode with a scan rate of  $10 \text{ mV s}^{-1}$ .

The  $V_{\text{oc}}$  appears at a more negative potential than the onset of photocurrent under certain sweeping conditions, as shown in Supplementary Fig. S5. This means that  $V_2$  is more positive than  $0 \text{ V}_{\text{RHE}}$  while current is flowing. In order to confirm that these small photocurrents

correspond to hydrogen evolution and not to e.g. proton intercalation, we carried out faradaic efficiency measurements (See Supplementary Fig. S6). Hydrogen was indeed observed at very small cathodic photocurrent densities, such as  $-0.08 \text{ mA cm}^{-2}$ , at potentials more positive than we would expect from the J- $\Delta V$  analysis. This phenomenon likely arises from the fact that the slightly lower electron density than in the illuminated area and consequently an actually slightly reduced  $V_{oc}$  is detected compared to the illuminated area (as shown in Fig. 1b). Thus, the onset potential appears earlier than the  $V_{oc}$  in Supplementary Fig. S5. This  $V_{oc}$  loss is highly dependent on the distance between the Au contact and the illumination area, represented by **d** in this scheme. For all the samples we measured, **d** is  $\sim 1 \text{ mm}$ . When intentionally lengthening **d**,  $V_{oc}$  further decreases, yielding  $\sim 75 \text{ mV}$  loss at **d** = 3 mm. From our experience with more than fifty samples, the offset between the measured  $V_{oc}$  and the apparent onset from the J-V1 curves is typically a few tens of mV with a platinum catalyst.

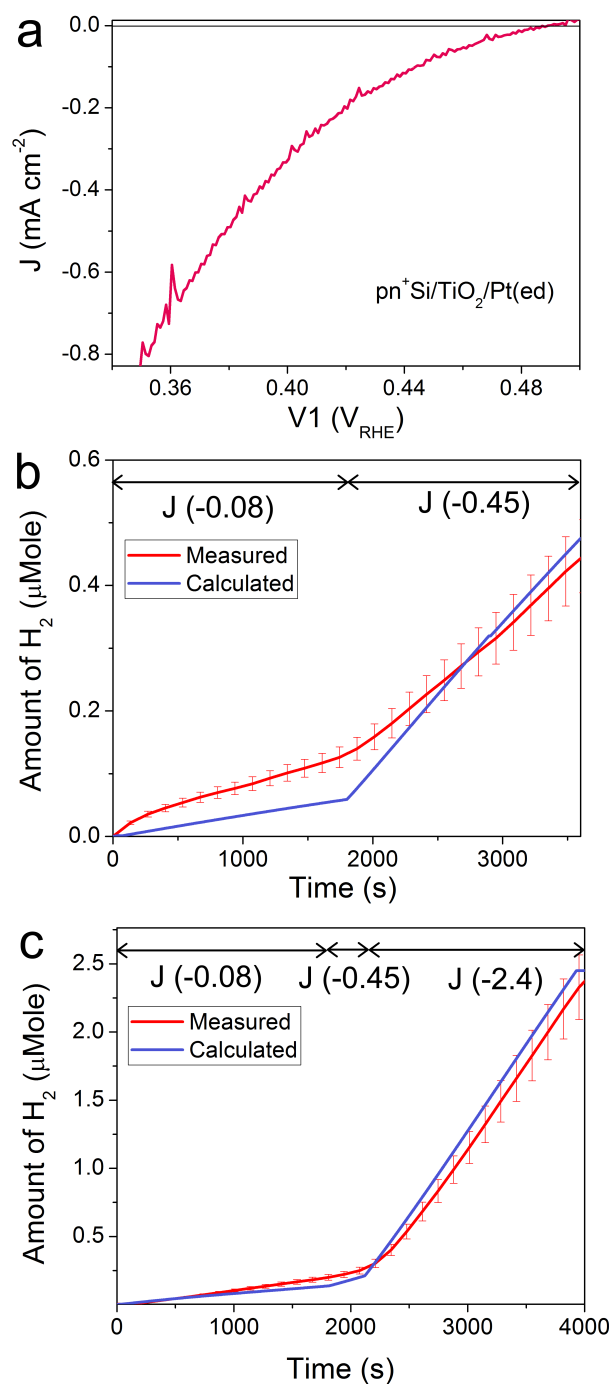

**Supplementary Fig. S6** (a) J-V1 curve of a  $\text{pn}^+\text{Si}/\text{TiO}_2/\text{Pt}(\text{ed})$  photocathode for faradaic efficiency measurements. (b)-(c) Comparison of calculated (by photocurrent) and measured  $\text{H}_2$  (by GC) under current control, due to the variation of potential with illumination intensity. Note that when the photocurrents are very small, precise measurement of the amount of  $\text{H}_2$  by GC is difficult, resulting in seemingly >100% faradaic efficiency for the very small values.

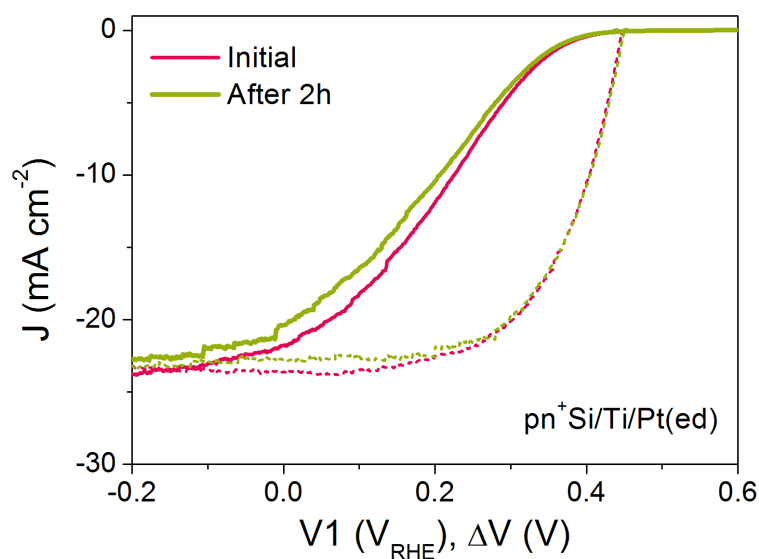

**Supplementary Fig. S7** J-V1 (solid) and J-ΔV (dashed) curves of  $\text{pn}^+\text{Si/Ti/Pt(ed)}$  before and after 2 h stability test.

A  $V_{\text{oc}}$  of 448 mV and a  $J_{\text{sc}}$  of  $23.5 \text{ mA cm}^{-2}$  are obtained from the initial J-ΔV curve, slightly smaller than that of the  $\text{pn}^+\text{Si/TiO}_2\text{/Pt(ed)}$  photocathode, which may be due to the antireflective property of  $\text{TiO}_2$  layer.<sup>2</sup> The initial J-V1 curve exhibits a large fill factor loss relative to the J-ΔV curve. The similarities of the J-ΔV parameters of this sample with those of the ALD-protected sample indicates that the 100 nm-thick  $\text{TiO}_2$  layer is highly conductive and does not contribute to a loss of fill factor in the J-V1 curve. After the 2 h stability test, the saturated photocurrent,  $V_{\text{oc}}$  and fill factor of the J-ΔV curves remained the same (see Supplementary Table S1), showing that the  $\text{pn}^+\text{-Si}$  junction is well protected by the thin Ti layer during the 2 h test.

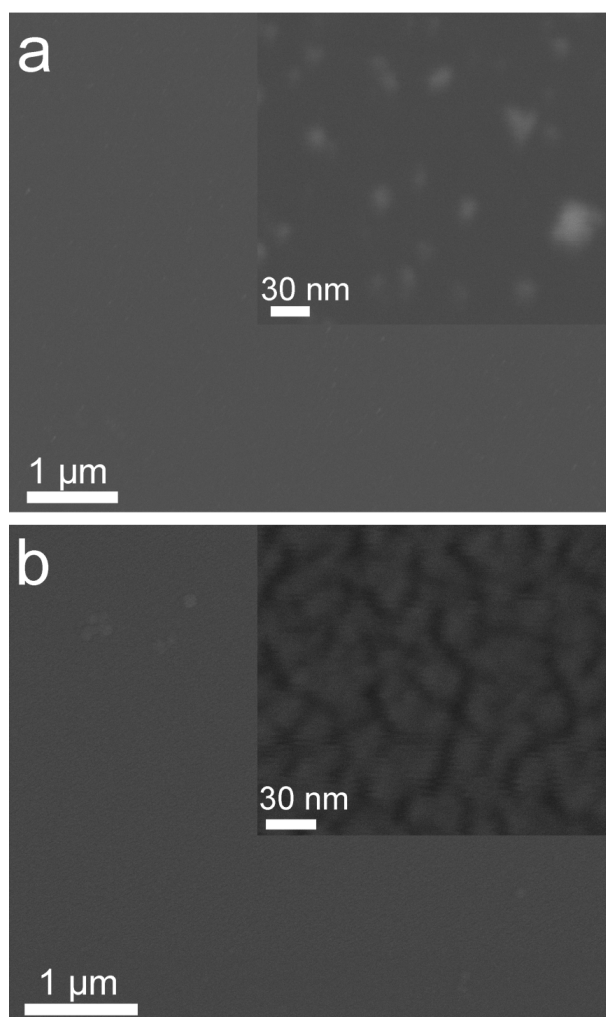

**Supplementary Fig. S8** Plan view SEM images of (a)  $\text{pn}^+\text{Si}/\text{TiO}_2/\text{pt}(\text{ed})$  and (b)  $\text{pn}^+\text{Si}/\text{TiO}_2/\text{pt}(\text{sp})$  photocathode.



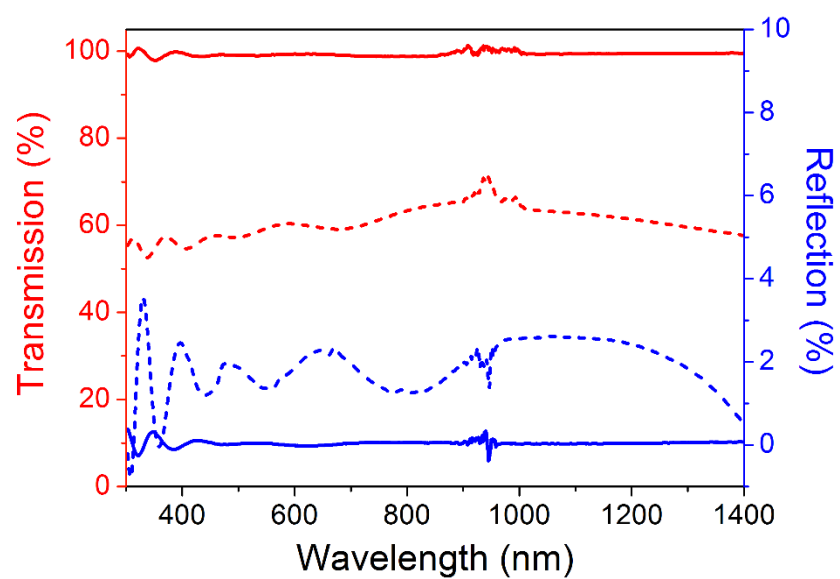

**Supplementary Fig. S9** Spectral transmission and reflectance curves for a Pt(ed) (solid) and Pt(sp) (dashed) deposited on FTO slides.

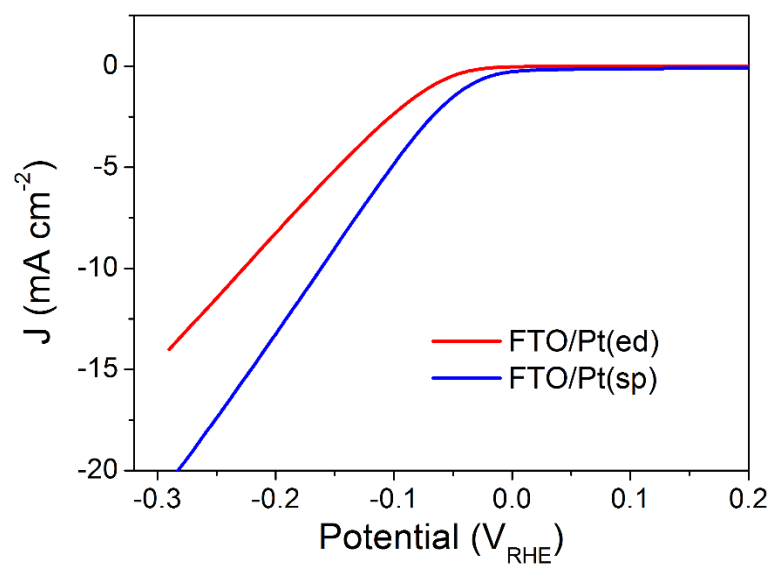

**Supplementary Fig. S10** J-V curves of Pt(ed) and Pt(sp) deposited on FTO slides in 0.5 M H<sub>2</sub>SO<sub>4</sub>.

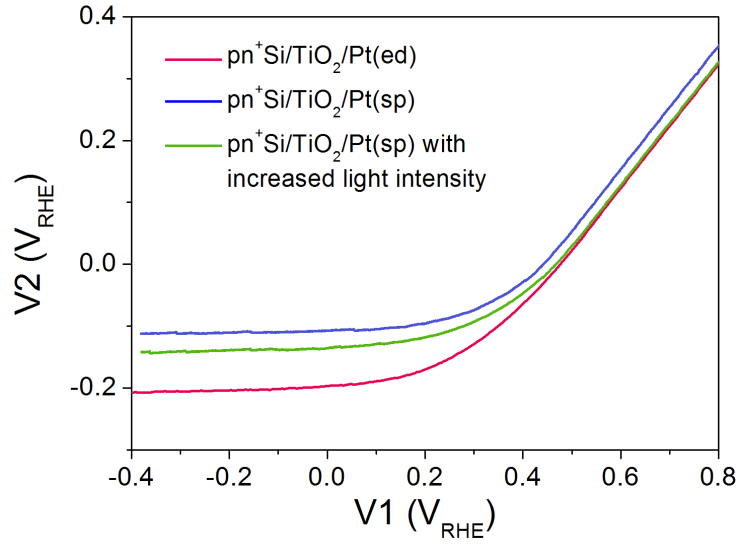

**Supplementary Fig. S11** V2-V1 curves of a  $\text{pn}^+\text{Si}/\text{TiO}_2/\text{Pt}(\text{ed})$  and a  $\text{pn}^+\text{Si}/\text{TiO}_2/\text{Pt}(\text{sp})$  photocathodes (under one sun illumination). For comparison, the performance of  $\text{pn}^+\text{Si}/\text{TiO}_2/\text{Pt}(\text{sp})$  with similar photocurrent densities as  $\text{pn}^+\text{Si}/\text{TiO}_2/\text{Pt}(\text{ed})$ , by increasing the light intensity, is also displayed (the green curve).

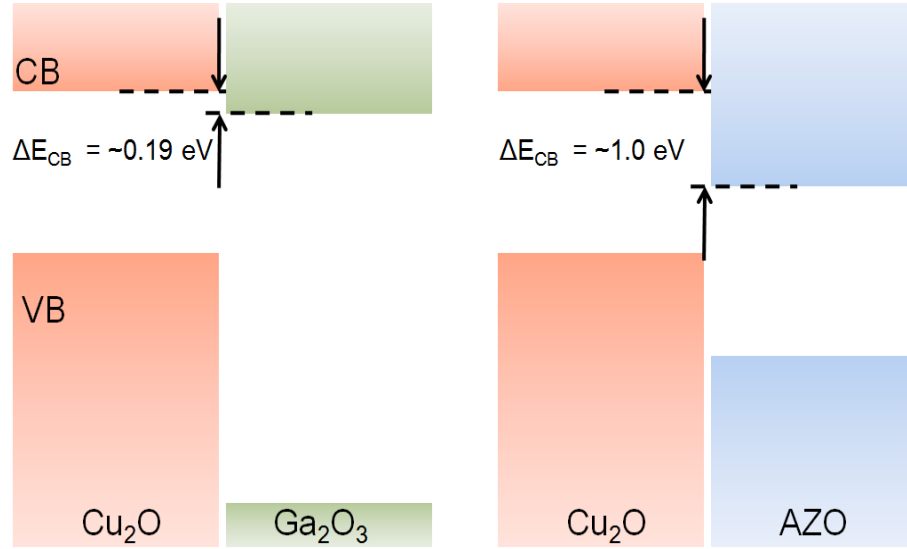

**Supplementary Fig. S12** Schematic band alignment of the  $\text{Cu}_2\text{O}/\text{Ga}_2\text{O}_3$  and  $\text{Cu}_2\text{O}/\text{AZO}$  heterojunctions.  $\text{Cu}_2\text{O}/\text{Ga}_2\text{O}_3$  exhibits a small conduction band offset ( $\Delta E_{\text{CB}}$ ) of  $\sim 0.19 \text{ eV}$ . This value is much smaller than the counterpart of  $\text{Cu}_2\text{O}/\text{AZO}$  ( $\sim 1 \text{ eV}$ ). Therefore, compared with AZO,  $\text{Ga}_2\text{O}_3$  shows an improved conduction-band offset with  $\text{Cu}_2\text{O}$ , enabling a larger photovoltage and the ability to shift the onset potential positively.

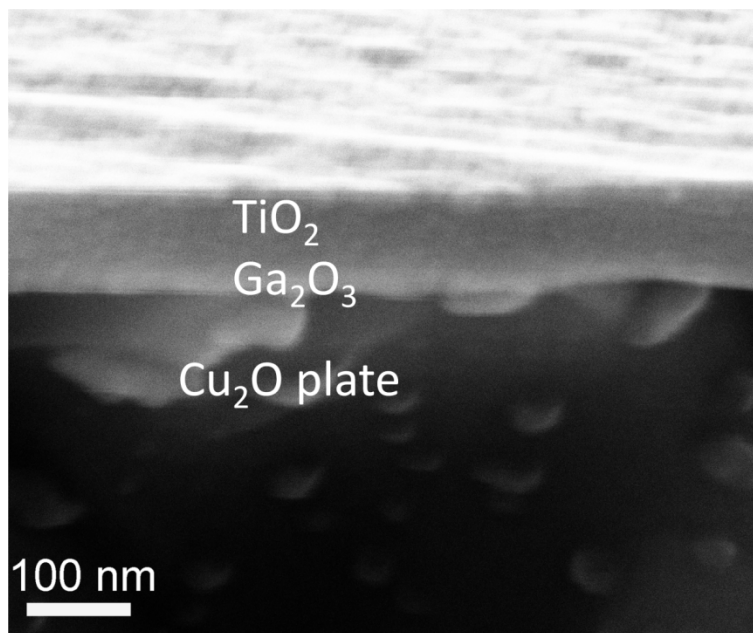

**Supplementary Fig. S13** Cross-sectional SEM image of Cu<sub>2</sub>O/Ga<sub>2</sub>O<sub>3</sub>/TiO<sub>2</sub> electrode. The thickness of Ga<sub>2</sub>O<sub>3</sub> and TiO<sub>2</sub> are 20 nm and 100 nm, respectively.

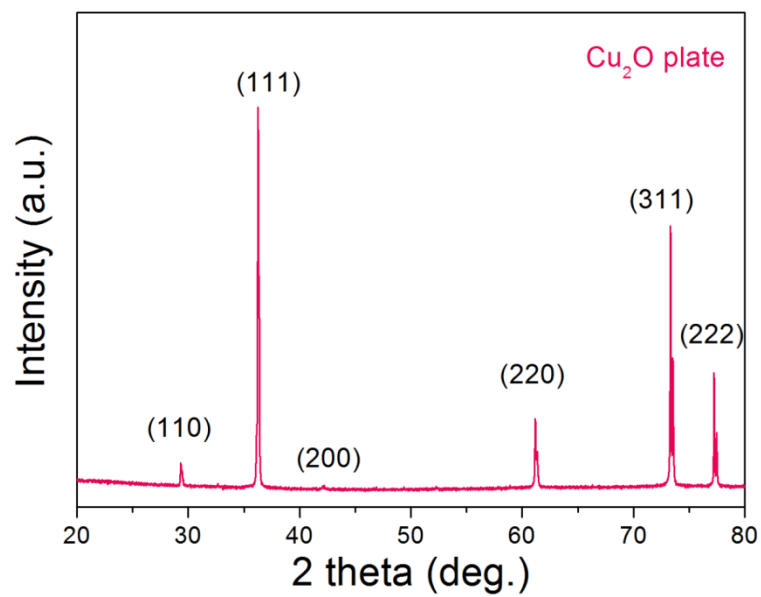

**Supplementary Fig. S14** The XRD pattern of the synthesized Cu<sub>2</sub>O plate. Identification of the diffraction peaks is referred to the standard Cu<sub>2</sub>O data (JCPDS No. 05-0667).

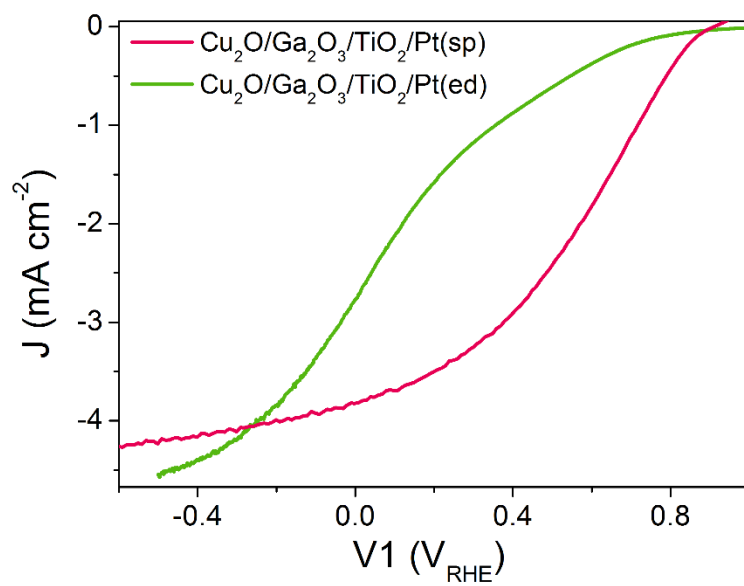

**Supplementary Fig. S 15** J-V1 curves of a  $\text{Cu}_2\text{O}/\text{Ga}_2\text{O}_3/\text{TiO}_2/\text{Pt}(\text{sp})$  and a  $\text{Cu}_2\text{O}/\text{Ga}_2\text{O}_3/\text{TiO}_2/\text{Pt}(\text{ed})$  photocathodes (under one sun illumination).

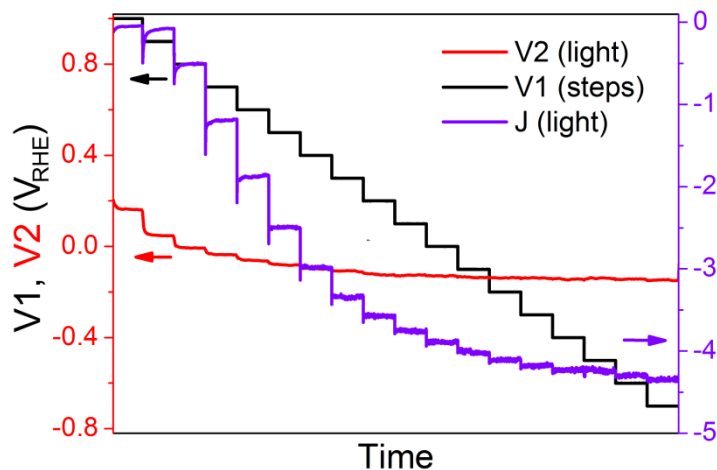

**Supplementary Fig. S16** V2 and J values of the  $\text{Cu}_2\text{O}/\text{Ga}_2\text{O}_3/\text{TiO}_2/\text{Pt}(\text{sp})$  photocathode under stepwise controlled V1 under one sun illumination. Each V1 step lasts 30 s.

When V1 is more positive than  $0.8 \text{ V}_{\text{RHE}}$ , V2 is more positive than  $0 \text{ V}_{\text{RHE}}$  but accompanied by a small photocurrent density. In this region,  $\Delta V$  is determined as  $\sim 800 \text{ mV}$ . When V1 is more negative than  $0.8 \text{ V}_{\text{RHE}}$ , the photocurrent increases and  $\Delta V$  shrinks dramatically, following the same trend as with the  $\text{pn}^+/\text{Si}$  photocathode. Eventually the photocurrent reaches a plateau and V2 likewise saturates, even as the V1 potential moves steadily more negative.



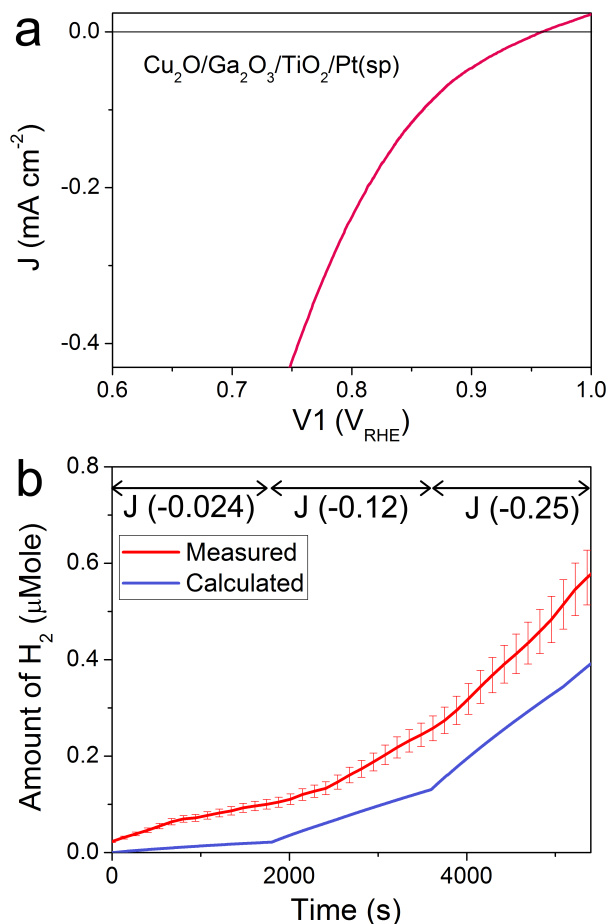

**Supplementary Fig. S17** J-V1 curve of a Cu<sub>2</sub>O/Ga<sub>2</sub>O<sub>3</sub>/TiO<sub>2</sub>/Pt(sp) photocathode for faradaic efficiency measurements. (b) Comparison of calculated (by photocurrent) and measured (by GC) H<sub>2</sub> under current control, due to the variation of potential with illumination intensity. Note that when the photocurrents are very small, precise measurement of the amount of H<sub>2</sub> by GC is difficult, resulting in seemingly >100% faradaic efficiency for the very small values.

As seen also with the silicon-based photocathode, the onset potential occurs earlier than the  $V_{oc}$  (Fig. 4b). Again, faradaic efficiency measurements were carried out at very small photocurrent densities, (e.g. -0.024 mA cm<sup>-2</sup>), which confirmed that these currents do indeed correspond to hydrogen evolution. The rationale for the discrepancy between the apparent onset and the measured  $V_{oc}$  is the same as for the silicon-based photocathode, discussed in Supplementary Fig. S7.

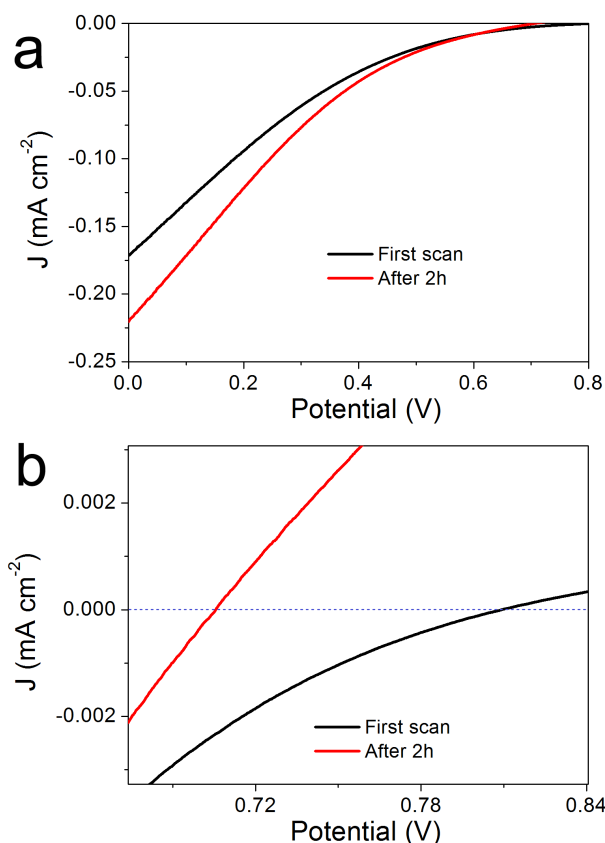

**Supplementary Figure S18** (a) Solid-state J-V curves of a Cu<sub>2</sub>O/Ga<sub>2</sub>O<sub>3</sub>/TiO<sub>2</sub> DWE measured in 2-electrode configuration (in air, no electrolyte present), before and after a 2 hour stability measurement at short circuit under one sun illumination. We note that the fill factor is poor and the series resistance is high since our DWE architecture was designed only to sense the potential of the surface with current being extracted into the electrolyte, and not to efficiently extract current through WE2. (b) Zoom-in of the V<sub>OC</sub> region.

## REFERENCES

- (1) Minami, T.; Nishi, Y.; Miyata, T.; Nomoto, J. High-Efficiency Oxide Solar Cells with ZnO/Cu<sub>2</sub>O Heterojunction Fabricated on Thermally Oxidized Cu<sub>2</sub>O Sheets. *Appl. Phys. Express* **2011**, 4 (6), 62301 DOI: 10.1143/apex.4.062301.
- (2) Richards, B. S. Comparison of TiO<sub>2</sub> and other dielectric coatings for

buried-contact solar cells: a review. *Prog. Photovoltaics* **2004**, *12* (4), 253–281

DOI: 10.1002/pip.529.
